# Supplementary material
Source: Springer Nature journal article supplement (https://www.springermedizin.de/resource/supplementary/13075_2010_2990_MOESM1_ESM.pdf/9693518)

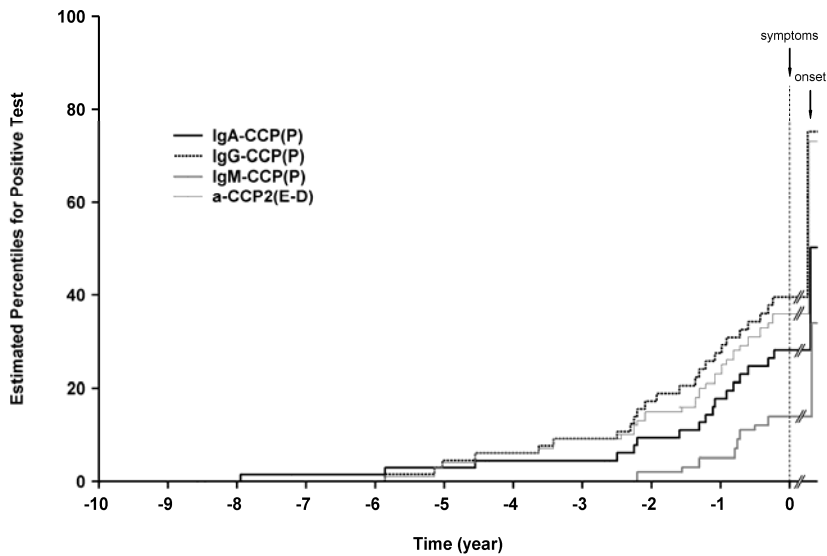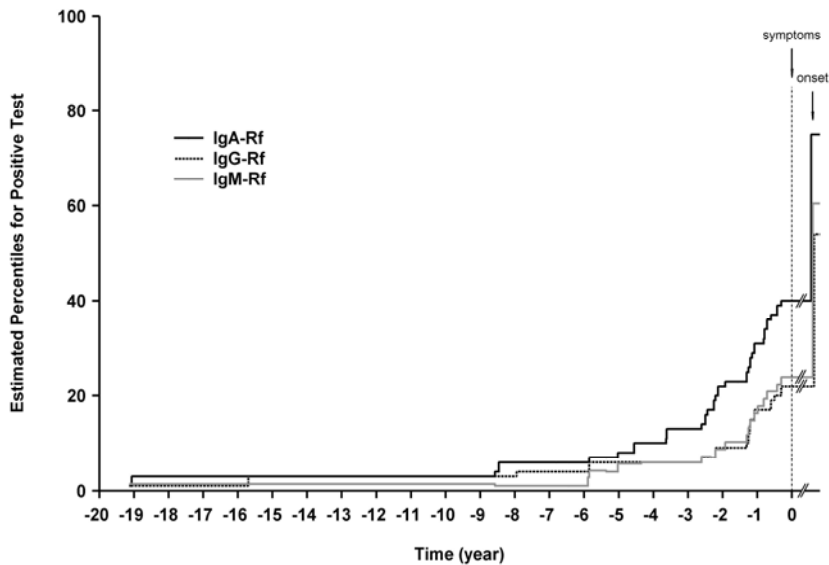

Supplement: MOESM1 [file 9693518]
